# Supplementary material for: Compound 3K, a Specific Pyruvate Kinase M2 Inhibitor, Induces Autophagic Cell Death through the Disruption of the Glycolytic Pathway in Ovarian Cancer Cells
Source: Preprints.org preprint supplement (doi:10.20944/preprints202009.0634.v1), 2020-09-26
Supplement: Supplementary file 1 [file supplementary]

# Supplementary Materials

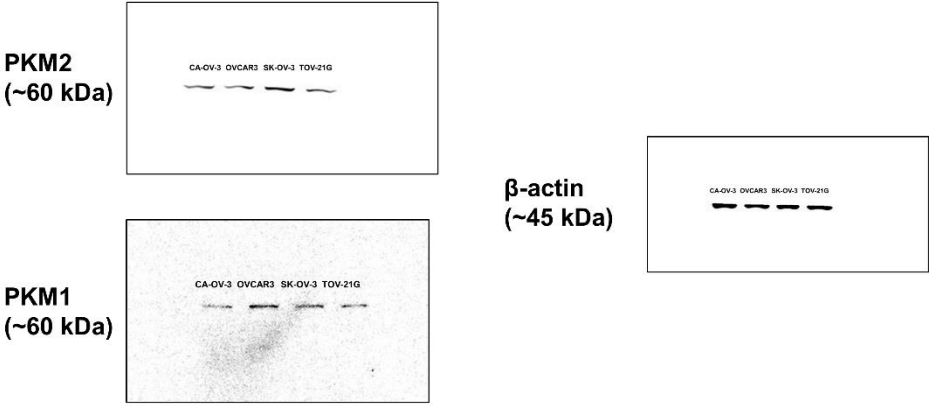

Figure S1. Uncropped Western blot images corresponding to Figure 2A.

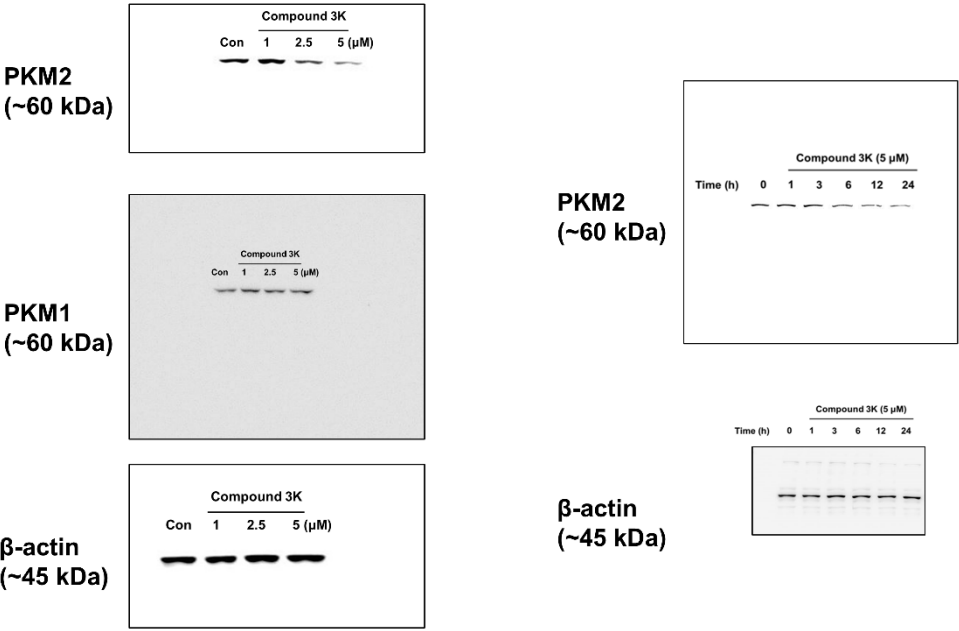

Figure S2. Uncropped Western blot images corresponding to Figure 3A and C.

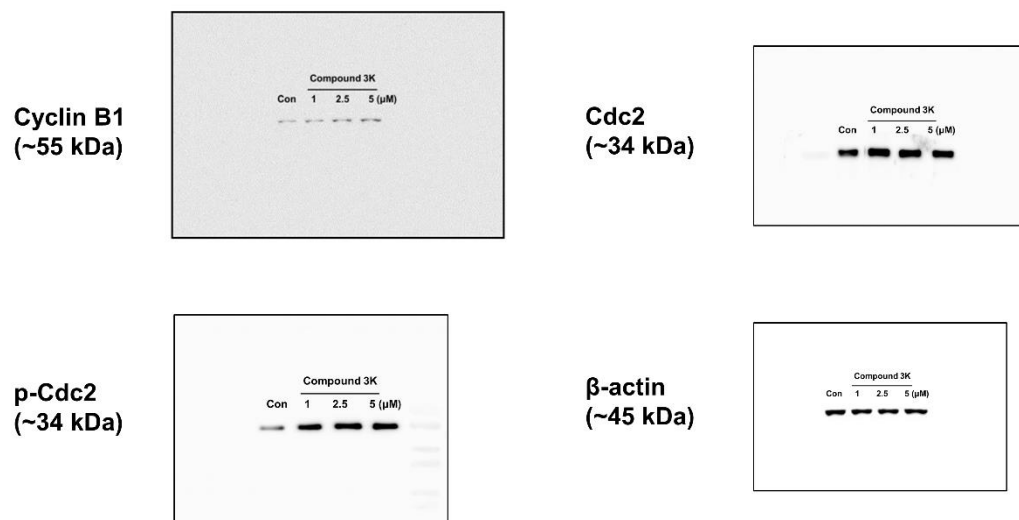

Figure S3. Uncropped Western blot images corresponding to Figure 4E.

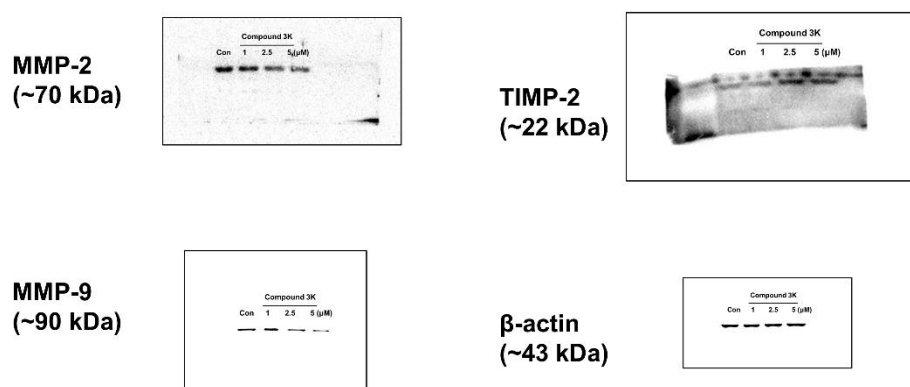

Figure S4. Uncropped Western blot images corresponding to Figure 5C.

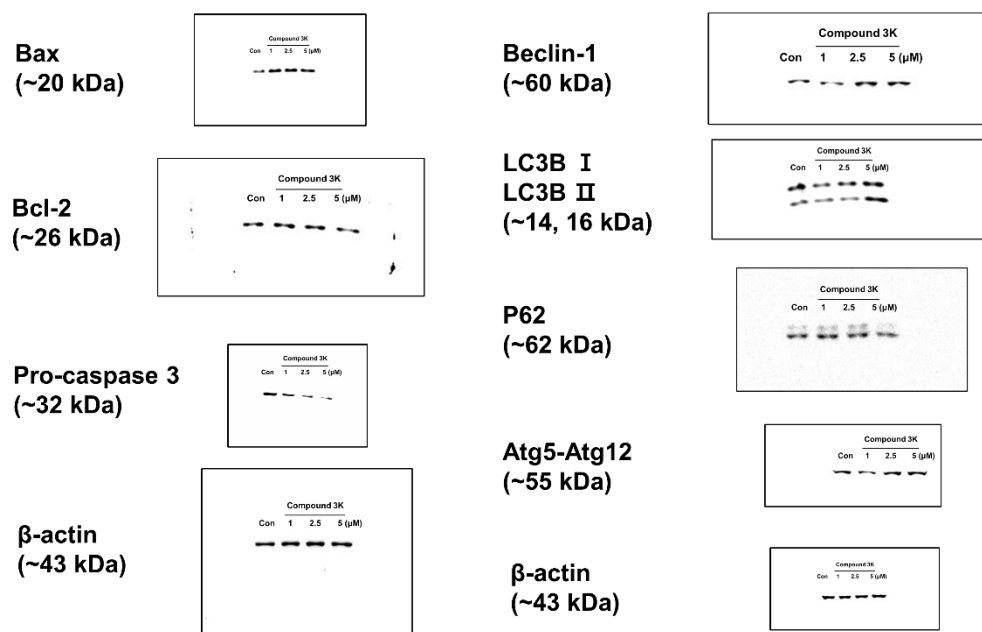

Figure S5. Uncropped Western blot images corresponding to Figure 6B and E.

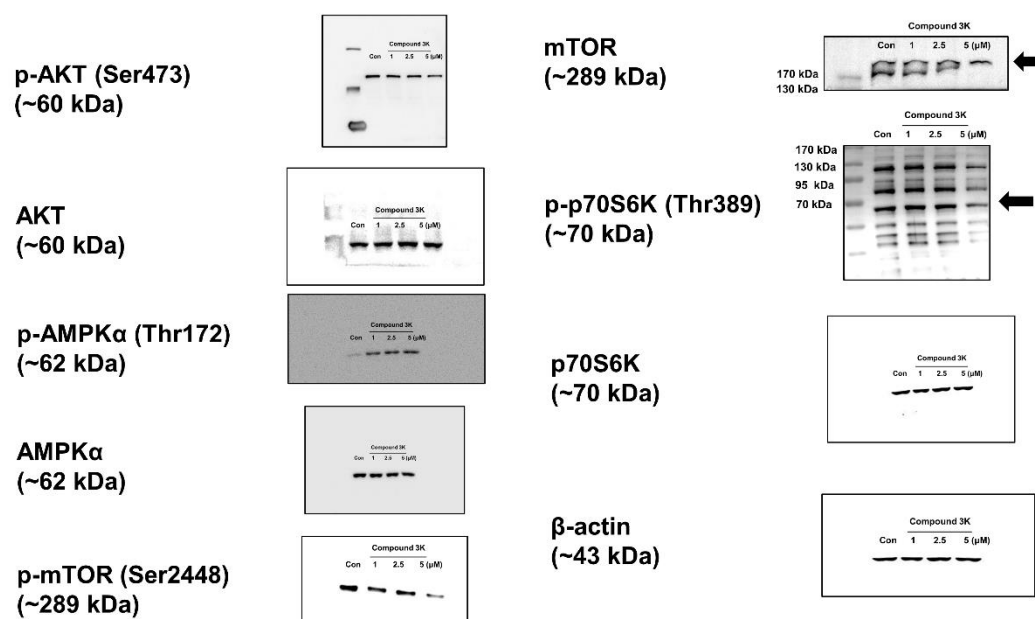

Figure S6. Uncropped Western blot images corresponding to Figure 7A.

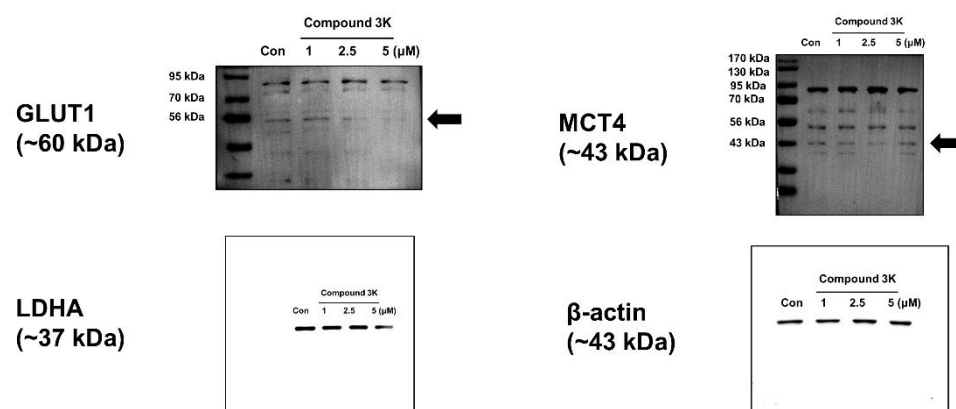

**Figure S7.** Uncropped Western blot images corresponding to Figure 8D.
